# Supplementary material for: Correlation of self-assembly and thermal conducting properties of PEG-backbone polyether with a room temperature mesophase
Source: Royal Society of Chemistry journal article supplement (doi:10.1039/d1me00182e), 2022-01-01
Supplement: d1me00182e1.pdf [file d1me00182e1.pdf]

## Supplementary Material

# Correlation of Self-Assembly and Thermal Conducting Properties of PEG-Backbone Polyether with Room Temperature Mesophase

*Kyosun Ku,<sup>a,†</sup> Soyeong Choe,<sup>b,†</sup> and Hyeonuk Yeo<sup>\*a,c</sup>*

<sup>a</sup> Department of Chemistry Education, <sup>b</sup> Department of Chemistry, <sup>c</sup> Department of Pharmacy, Kyungpook National University, Daegu 41566, Republic of Korea.

<sup>†</sup> K. Ku and S. Choe contributed equally to this work.

\*Email: [yeo@knu.ac.kr](mailto:yeo@knu.ac.kr)

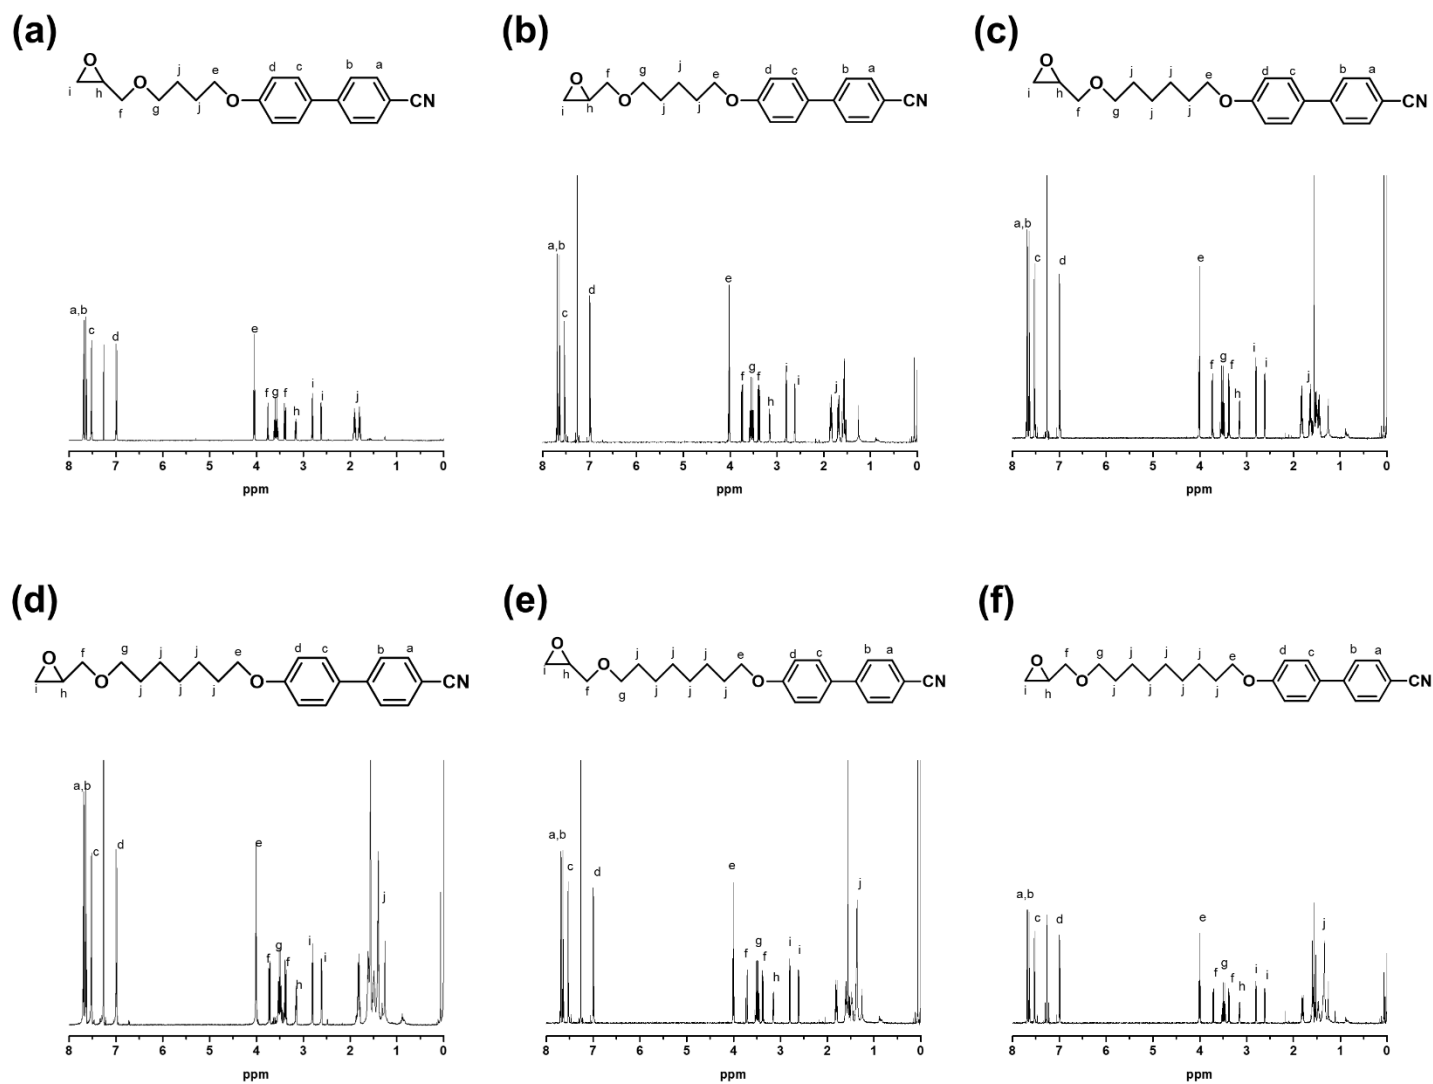

**Figure S1.**  $^1\text{H}$ -NMR spectra of EPCN $n$  in  $\text{CDCl}_3$ : (a) EPCN4, (b) EPCN5, (c) EPCN6, (d) EPCN7, (e) EPCN8, and (f) EPCN9.

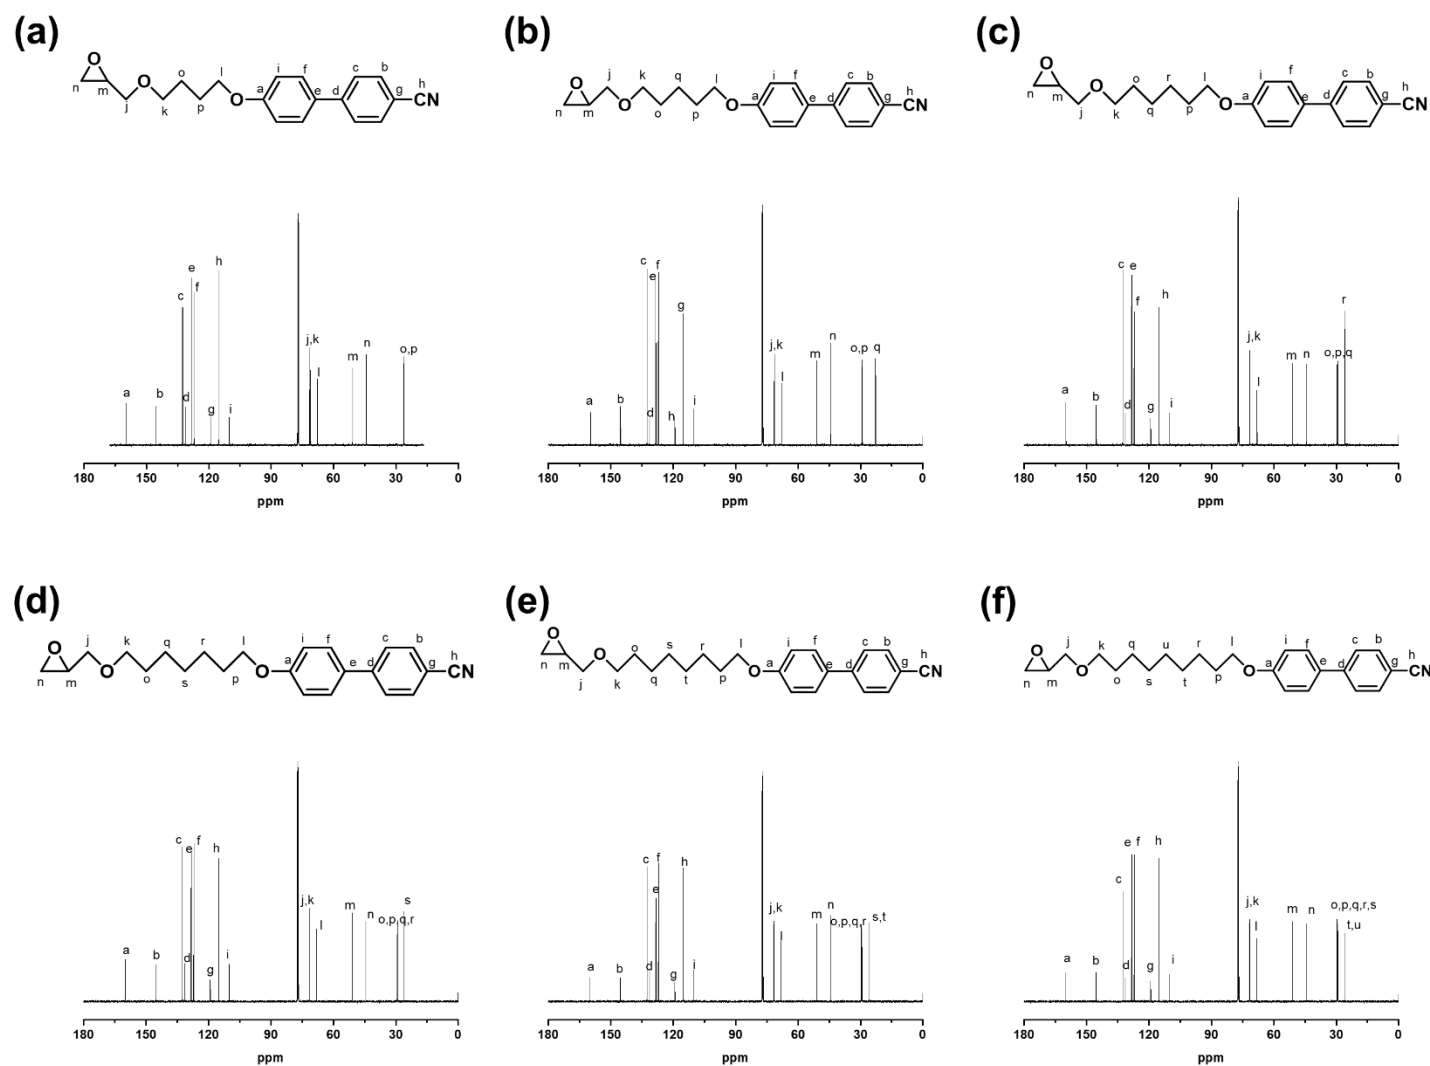

**Figure S2.**  $^{13}\text{C}$ -NMR spectra of EPCN $_n$  in  $\text{CDCl}_3$ : (a) EPCN4, (b) EPCN5, (c) EPCN6, (d) EPCN7, (e) EPCN8, and (f) EPCN9.

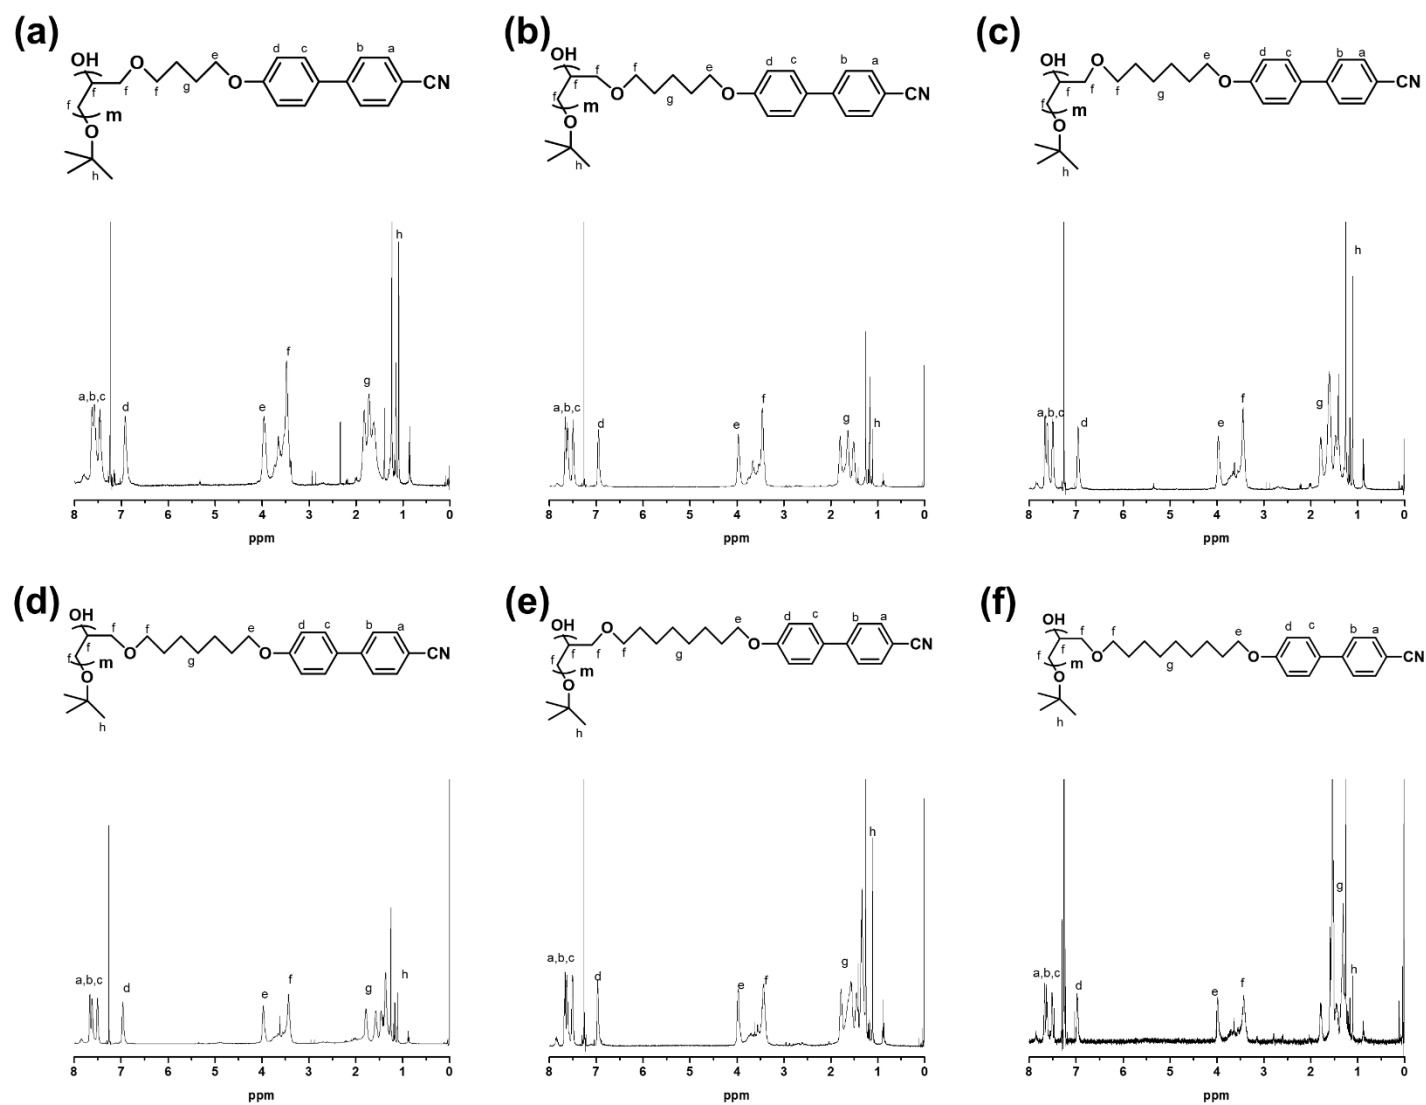

**Figure S3.**  $^1\text{H}$ -NMR spectra of P-EPCN $n$  in  $\text{CDCl}_3$ : (a) P-EPCN4, (b) P-EPCN5, (c) P-EPCN6, (d) P-EPCN7, (e) P-EPCN8, and (f) P-EPCN9.

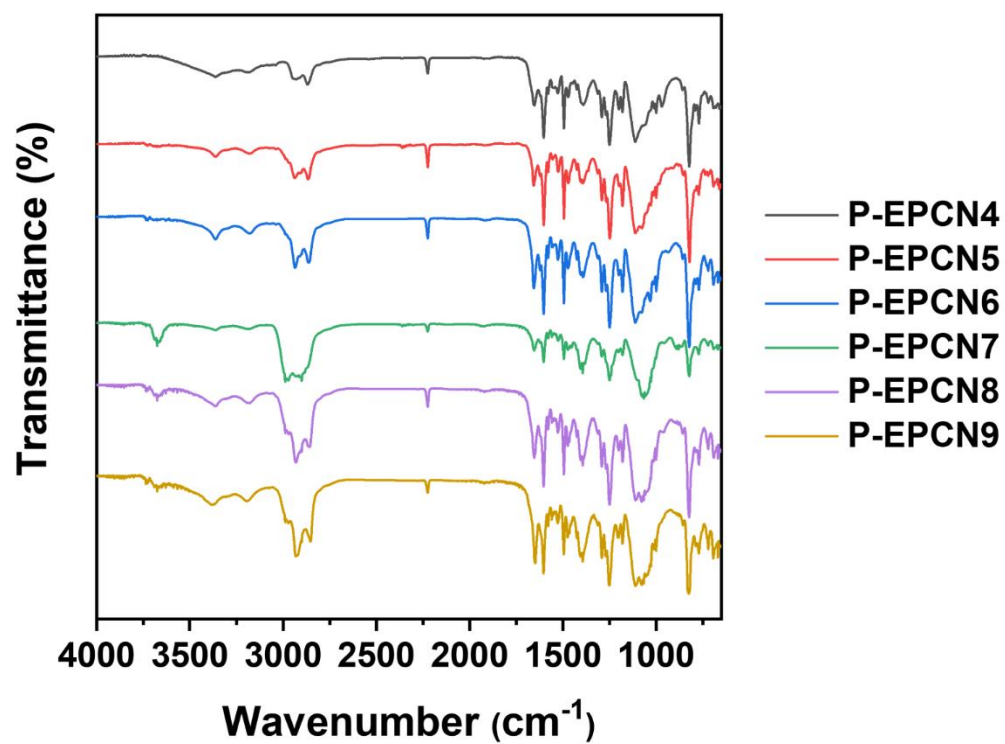

**Figure S4.** FT-IR spectra of P-EPCN<sub>n</sub>.

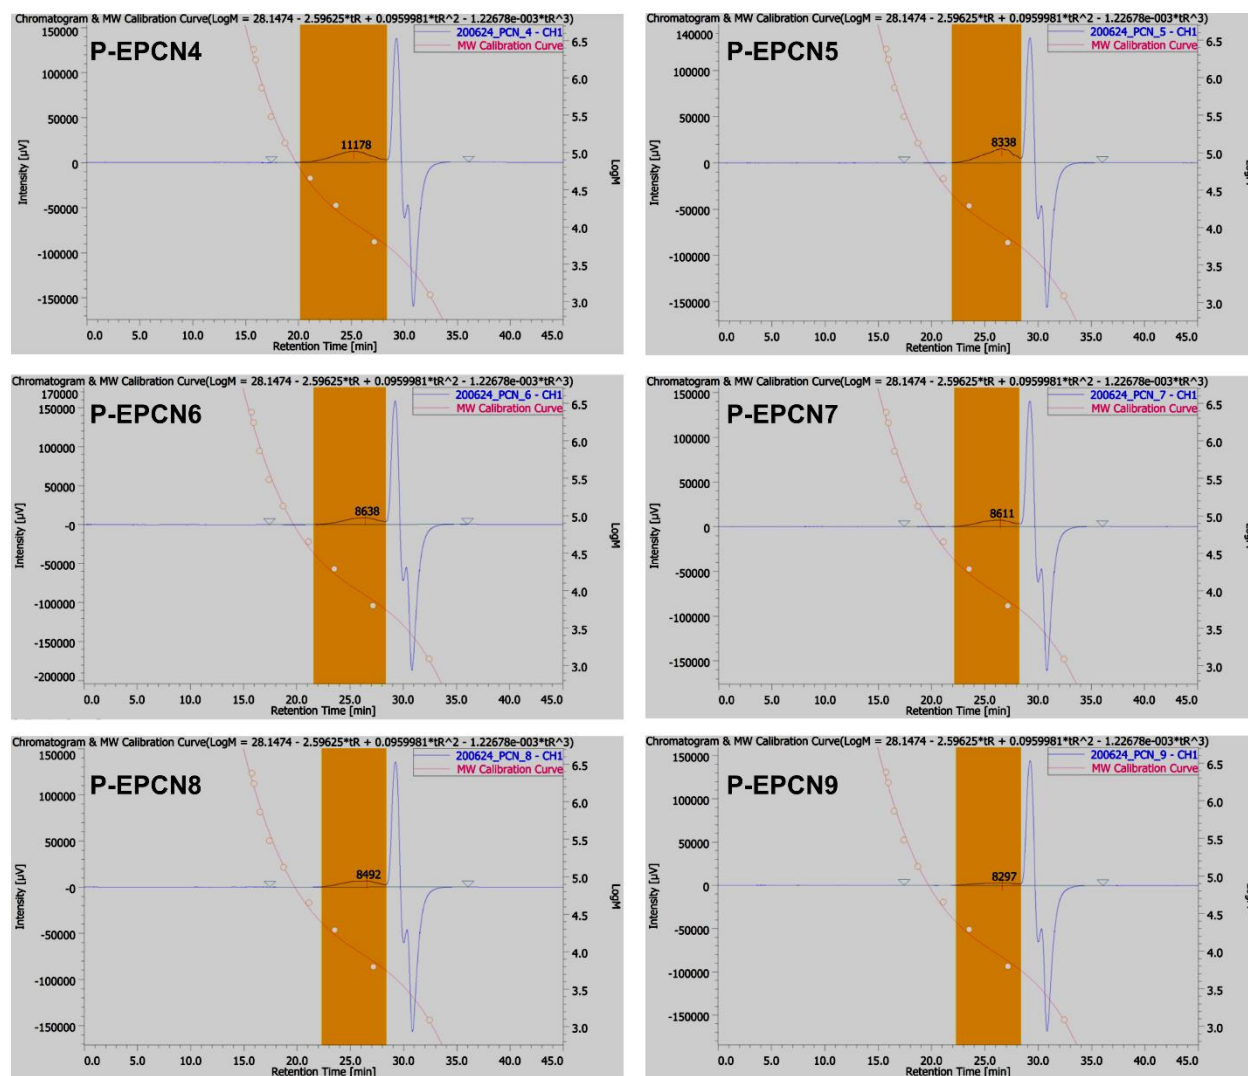

**Figure S5.** GPC data of P-EPCN<sub>n</sub>.

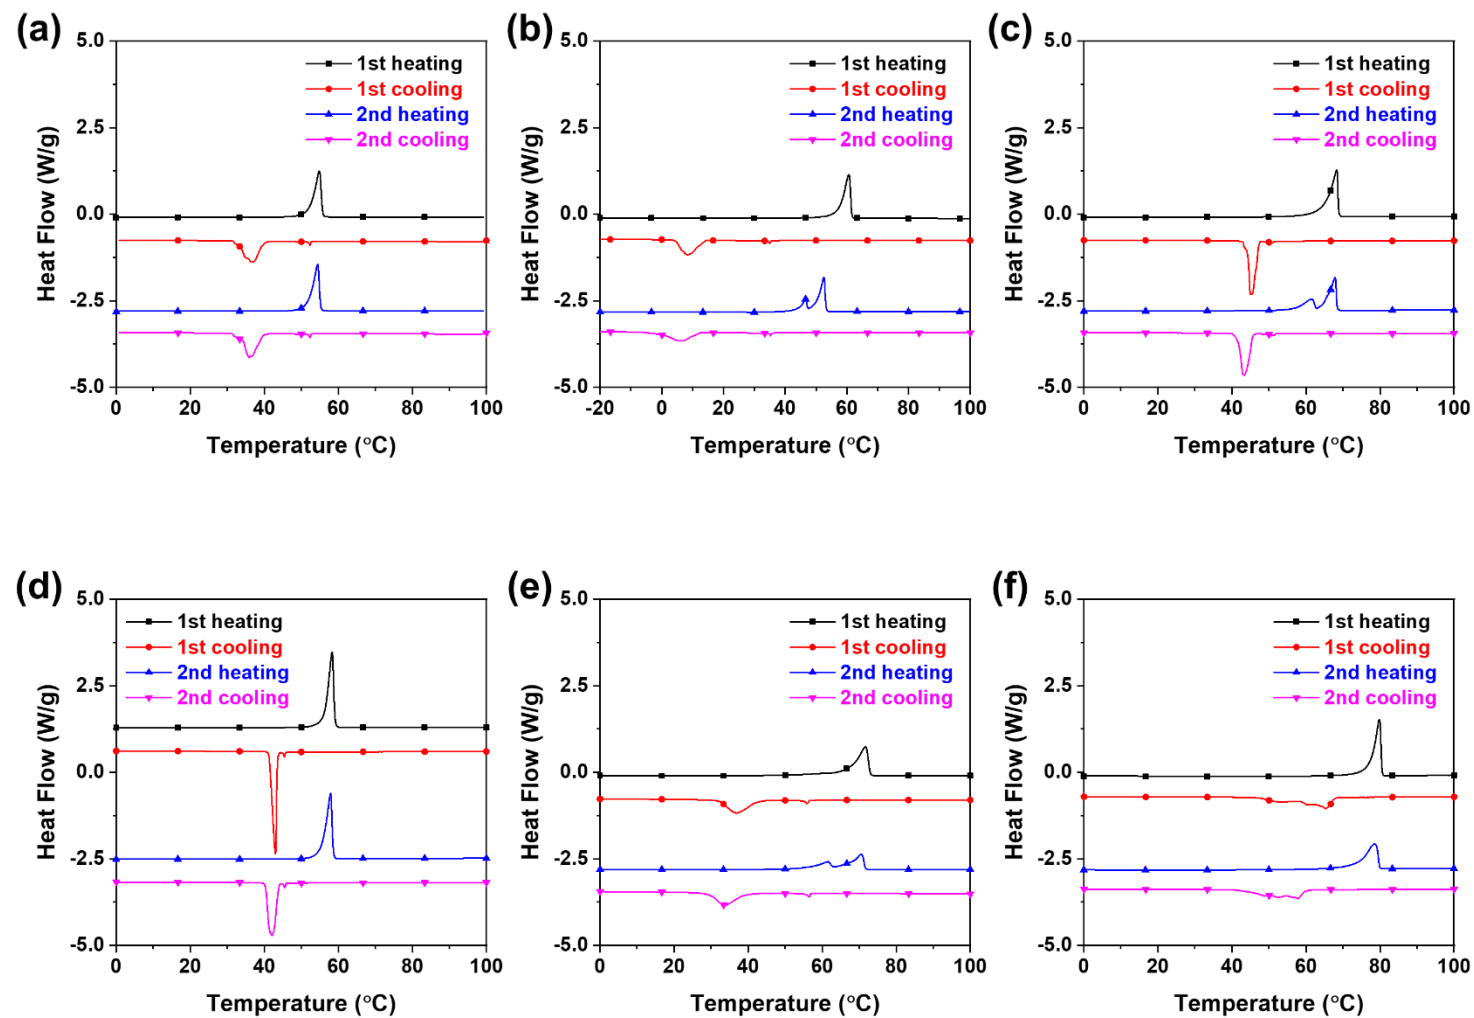

**Figure S6.** DSC curves of EPCN<sub>n</sub> at heating and cooling rate of 2 °C/min: (a) EPCN4, (b) EPCN5, (c) EPCN6, (d) EPCN7, (e) EPCN8, and (f) EPCN9.

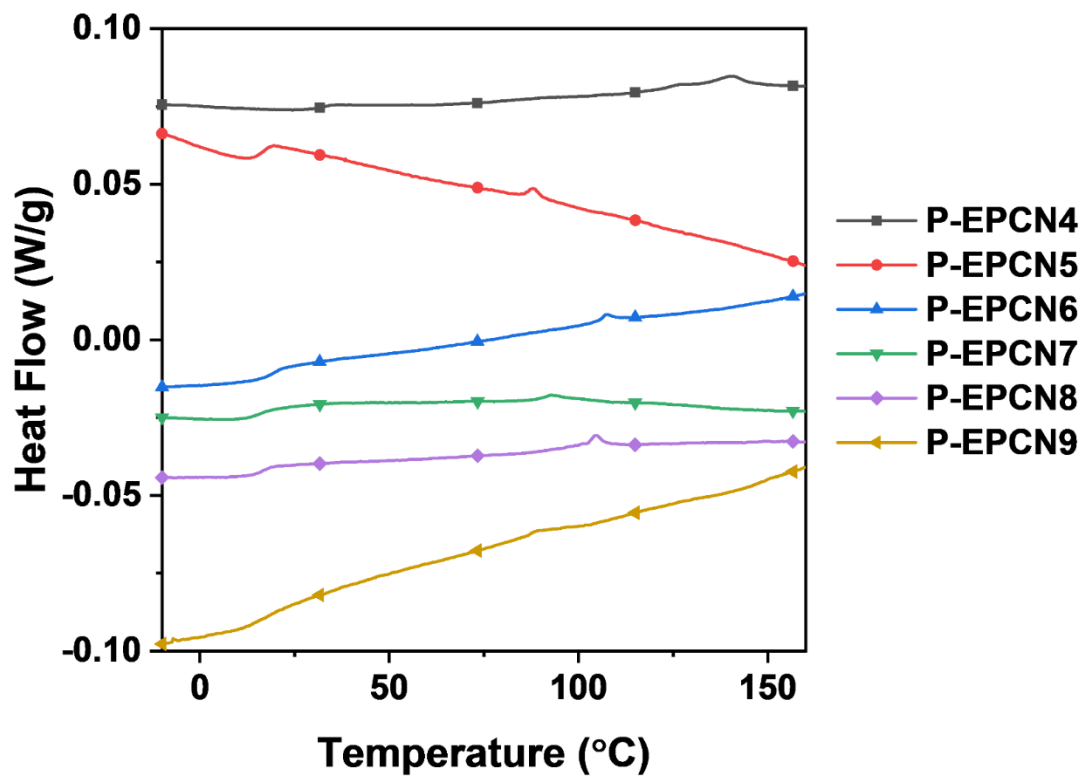

**Figure S7.** DSC curves of P-EPCN<sub>n</sub> in second heating cycles at heating rate of 5 °C/min.

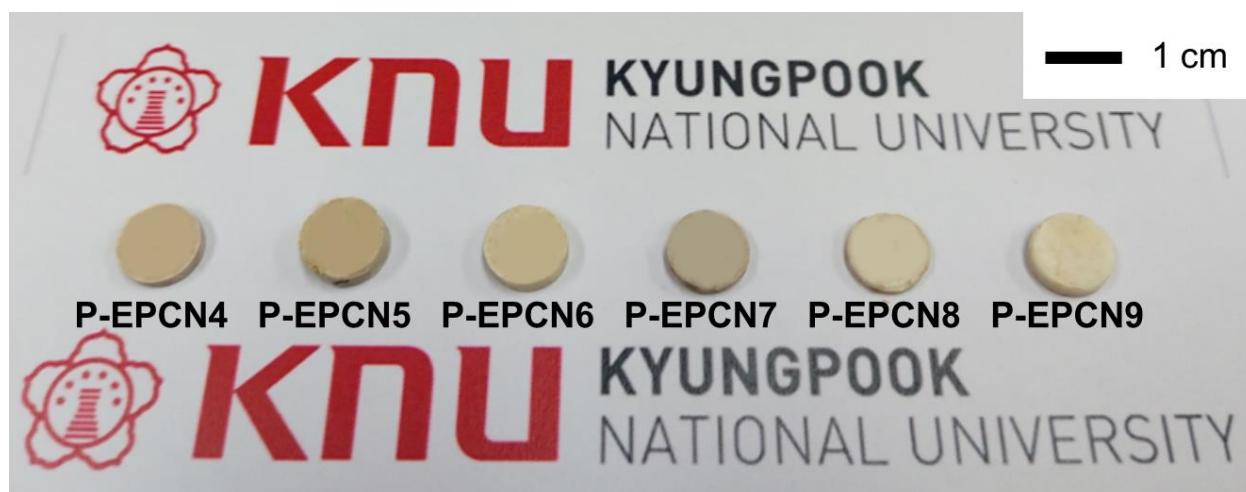

**Figure S8.** The photographs of P-EPCN<sub>n</sub> in bulk states.

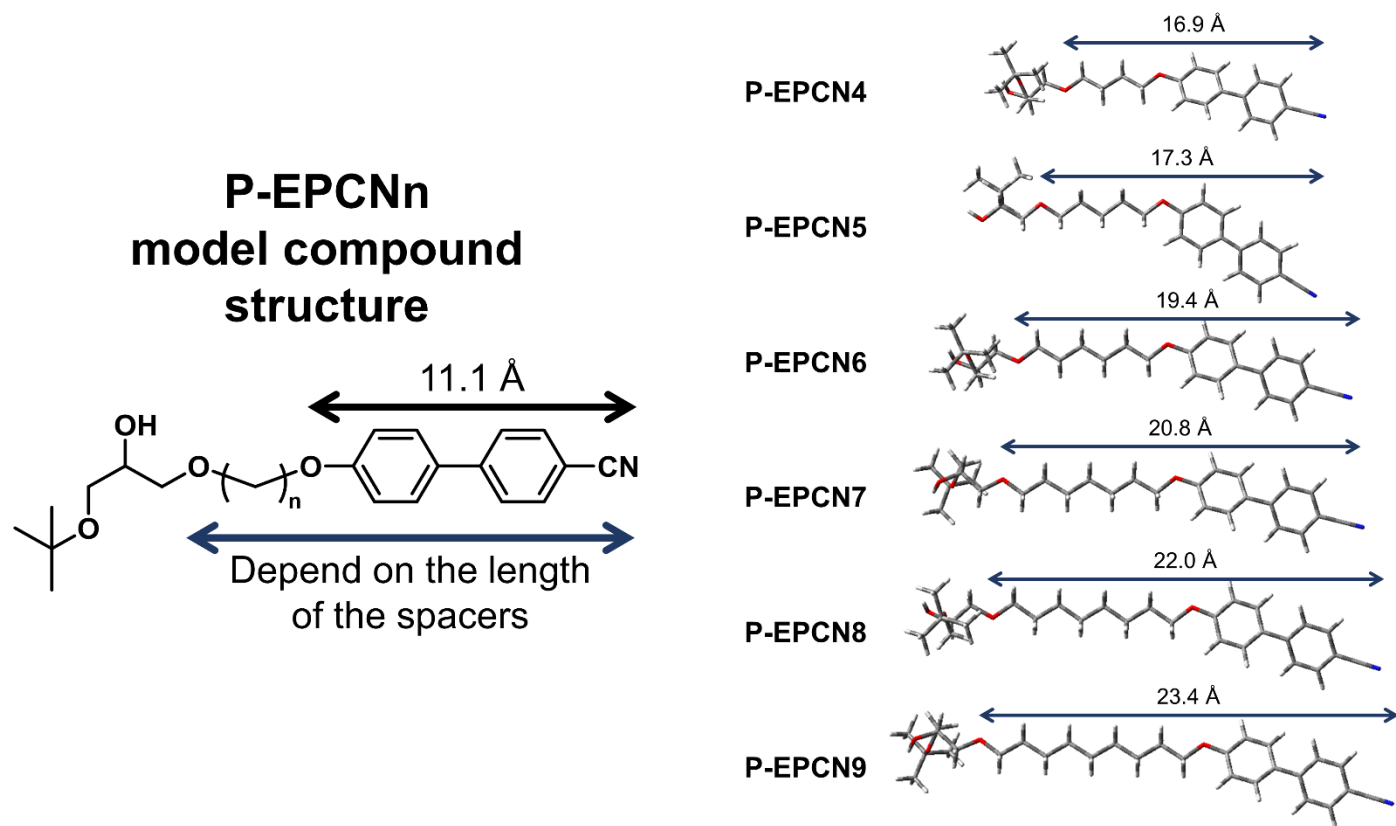

**Figure S9.** Optimized molecular structures of P-EPCN<sub>n</sub> model compounds calculated by density functional theory at B3LYP/6-31 level.
